# Supplementary material for: Gain and loss of an intron in a protein-coding gene in Archaea: the case of an archaeal RNA pseudouridine synthase gene
Source: Springer Nature journal article supplement (doi:10.1186/1471-2148-9-198), 2009-08-11
Supplement: Additional file 1 [file 1471-2148-9-198-s1.pdf]

Table 1. Strains and size of cbf5 intron

| order* | family** | species***                          | JCM strain number | reference**** | accession number*****                   | intron (bp) |
|--------|----------|-------------------------------------|-------------------|---------------|-----------------------------------------|-------------|
| D      | D        | <i>Acidilobus aceticus</i>          | 11320             | 2,a           | [DDBJ:AB245528]                         | 29          |
| D      | D        | <i>Aeropyrum camini</i>             | 12091             | 2,a           | [DDBJ:AB245529]                         | 37          |
| D      | D        | <i>Aeropyrum pernix</i>             | 9820              | 1,2,52        | [DDBJ:AB245523] (c), [DDBJ:BA000002]    | 38          |
| D      | D        | <i>Caldisphaera lagunensis</i>      | 11604             | 2,a           | [DDBJ:AB245530]                         | 29          |
| D      | D        | <i>Desulfurococcus amylolyticus</i> | 9188              | a             | [DDBJ:AB304834]                         | 21          |
| D      | D        | <i>Desulfurococcus mobilis</i>      | 9186              | 2,a           | [DDBJ:AB245531]                         | 16          |
| D      | D        | <i>Desulfurococcus mucosus</i>      | 9187              | a             | [DDBJ:AB304835]                         | 16          |
| D      | D        | <i>Ignicoccus hospitalis</i>        | DSM18386          | 31            | [Genbank:CP000816]                      | 0           |
| D      | D        | <i>Ignicoccus islandicus</i>        | DSM13165          | 2,a           | [DDBJ:AB245532]                         | 0           |
| D      | D        | <i>Ignicoccus pacificus</i>         | DSM13166          | a             | [DDBJ:AB304836]                         | 0           |
| D      | D        | <i>Ignisphaera aggregans</i>        | 13409             | a             | [DDBJ:AB304841]                         | 39          |
| D      | D        | <i>Staphylothermus hellenicus</i>   | 10830             | a             | [DDBJ:AB304837]                         | 36          |
| D      | D        | <i>Staphylothermus marinus</i>      | 9404              | 2,a           | [DDBJ:AB245533]                         | 36          |
| D      | D        | <i>Stetteria hydrogenophila</i>     | 10135             | 2,a           | [DDBJ:AB245534]                         | 33          |
| D      | D        | <i>Sulfophobococcus zilligii</i>    | 10309             | 2,a           | [DDBJ:AB245535]                         | 32          |
| D      | D        | <i>Thermodiscus maritimus</i>       | 11597             | 2,a           | [DDBJ:AB245536]                         | 44          |
| D      | D        | <i>Thermosphaera aggregans</i>      | DSM11486          | 2,a           | [DDBJ:AB245537]                         | 19          |
| D      | P        | <i>Hyperthermus butylicus</i>       | 9403              | 2,a           | [DDBJ:AB245538]                         | 0           |
| D      | P        | <i>Pyrodictium abyssii</i>          | 9394              | a             | [DDBJ:AB304838]                         | 0           |
| D      | P        | <i>Pyrodictium brockii</i>          | 9392              | a             | [DDBJ:AB304839]                         | 0           |
| D      | P        | <i>Pyrodictium occultum</i>         | 9393              | 2,a           | [DDBJ:AB245539]                         | 0           |
| D      | P        | <i>Pyrolobus fumarii</i>            | DSM11204          | 2,a           | [DDBJ:AB245540]                         | 0           |
| D      | u        | ' <i>Caldococcus noboribetus</i> '  | 13516             | a             | [DDBJ:AB304840]                         | 29          |
| S      | S        | <i>Acidianus ambivalens</i>         | 9191              | a             | [DDBJ:AB304842]                         | 20          |
| S      | S        | <i>Acidianus brierleyi</i>          | 8954              | a             | [DDBJ:AB304843]                         | 19          |
| S      | S        | <i>Acidianus infernus</i>           | 8955              | 2,a           | [DDBJ:AB245541]                         | 20          |
| S      | S        | <i>Metallosphaera hakonensis</i>    | 8857              | 2,a           | [DDBJ:AB245542]                         | 19          |
| S      | S        | <i>Metallosphaera sedula</i>        | 9185              | 2,a           | [DDBJ:AB245543]                         | 19          |
| S      | S        | <i>Stygiolobus azoricus</i>         | 9021              | 2,a           | [DDBJ:AB245544]                         | 22          |
| S      | S        | <i>Sulfolobus acidocaldarius</i>    | DSM639            | 2,48          | [DDBJ:AB245526] (c), [Genbank:CP000077] | 22          |
| S      | S        | <i>Sulfolobus acidocaldarius</i>    | 9063              | 2,a           | [DDBJ:AB245527] (c), [DDBJ:AB245545]    | 22          |
| S      | S        | <i>Sulfolobus metallicus</i>        | 9184              | 2,a           | [DDBJ:AB245546]                         | 22          |
| S      | S        | <i>Sulfolobus shibatae</i>          | 8931              | 2,a           | [DDBJ:AB245547]                         | 23          |
| S      | S        | <i>Sulfolobus solfataricus</i>      | 11322             | 1,53          | [DDBJ:AB245525] (c), [EMBL:AE006641]    | 22          |
| S      | S        | <i>Sulfolobus tokodaii</i>          | 10545             | 1,54          | [DDBJ:AB245524] (c), [DDBJ:BA000023]    | 31          |
| S      | S        | <i>Sulfurisphaera ohwakuensis</i>   | 9065              | 2,a           | [DDBJ:AB245548]                         | 31          |
| T      | Tf       | ' <i>Thermofilum librum</i> '       | DSM2337           | a             | [DDBJ:AB261610]                         | 0           |
| T      | Tf       | <i>Thermofilum pendens</i>          | DSM2475           | a             | [DDBJ:AB261609]                         | 0           |
| T      | Tp       | <i>Caldivirga maquilingensis</i>    | 10307             | 2,a           | [DDBJ:AB245549]                         | 0           |
| T      | Tp       | <i>Pyrobaculum aerophilum</i>       | 9630              | 55            | [Genbank:AE009441]                      | 0           |
| T      | Tp       | <i>Pyrobaculum arsenaticum</i>      | 11321             | a             | [DDBJ:AB304844]                         | 0           |
| T      | Tp       | <i>Pyrobaculum islandicum</i>       | 9189              | a             | [DDBJ:AB304845]                         | 0           |
| T      | Tp       | <i>Pyrobaculum oguniense</i>        | 10595             | 2,a           | [DDBJ:AB245550]                         | 0           |
| T      | Tp       | <i>Pyrobaculum organotrophum</i>    | 9190              | a             | [DDBJ:AB304846]                         | 0           |
| T      | Tp       | <i>Pyrobaculum calidifontis</i>     | 11548             | unpublished   | [Genbank:CP000561]                      | 0           |
| T      | Tp       | <i>Thermocladium modestius</i>      | 10088             | 2,a           | [DDBJ:AB245551]                         | 0           |
| T      | Tp       | <i>Thermoproteus neutrophilus</i>   | 9278              | 2,a           | [DDBJ:AB245552]                         | 0           |
| T      | Tp       | <i>Thermoproteus tenax</i>          | 9277              | 2,a           | [DDBJ:AB245553]                         | 0           |
| T      | Tp       | <i>Vulcanisaeta distributa</i>      | 11212             | 2,a           | [DDBJ:AB245554]                         | 0           |
| T      | Tp       | <i>Vulcanisaeta souniana</i>        | 11219             | a             | [DDBJ:AB304847]                         | 0           |
| C      | C        | ' <i>Cenarchaeum symbiosum</i> '    |                   | 2,56          | [Genbank:DP000238]                      | 0           |
| N      | N        | ' <i>Nitrosopumilus maritimus</i> ' |                   | unpublished   | [Genbank:CP000866]                      | 0           |
| K      |          | <i>Ca. Korarchaeum cryptofilum</i>  |                   | 30            | [Genbank:CP000968]                      | 0           |

\*: D; Desulfurococcales, S; Sulfolobales, T; Thermoproteales, C; 'Cenarchaeales', N; 'Nitrosopumilales', K; 'Korarchaeota' (phylum)

\*\*: D; Desulfurococcaceae, P; Pyrodictiaceae, u; unclassified, S; Sulfolobaceae, Tf; Thermofilaceae, Tp; Thermoproteaceae, C; Cenarchaeaceae, N; 'Nitrosopumilaceae'

\*\*\*: Ca., Candidatus

\*\*\*\*: Only the references for the data used in the present study are shown. See the text in the detail. a; the present study.

\*\*\*\*\*: Only the number for the data used in the present study are shown. (c), cDNA
